# Supplementary material for: Carbon ion therapy (C12) for high-grade malignant salivary gland tumors (MSGTs) of the head and neck: do non-ACCs profit from dose escalation?
Source: Radiat Oncol. 2016 Jul 7;11:90. doi: 10.1186/s13014-016-0657-z (PMC4936021; doi:10.1186/s13014-016-0657-z)
Supplement: Additional file 4: Figure S3. — OS according to site of origin (ODP 16 kb) [file 13014_2016_657_MOESM4_ESM.odp]

## Slide: figure 3s: OS: site
figure S3: OS: site
